# Supplementary material
Source: MDPI journal article supplement (https://www.mdpi.com/2073-4344/9/7/601)
Supplement: s1 [file s1]

Supplementary material for

# **Activated Carbon as a Cathode for Water Disinfection through the Electro-Fenton Process**

**Long Chen, Ameet Pinto and Akram N. Alshawabkeh \***

Department of Civil and Environmental Engineering, Northeastern University, Boston, MA 02115, USA

\* Correspondence: [a.alshawabkeh@northeastern.edu](mailto:a.alshawabkeh@northeastern.edu) Tel.: +1-617-373-3994

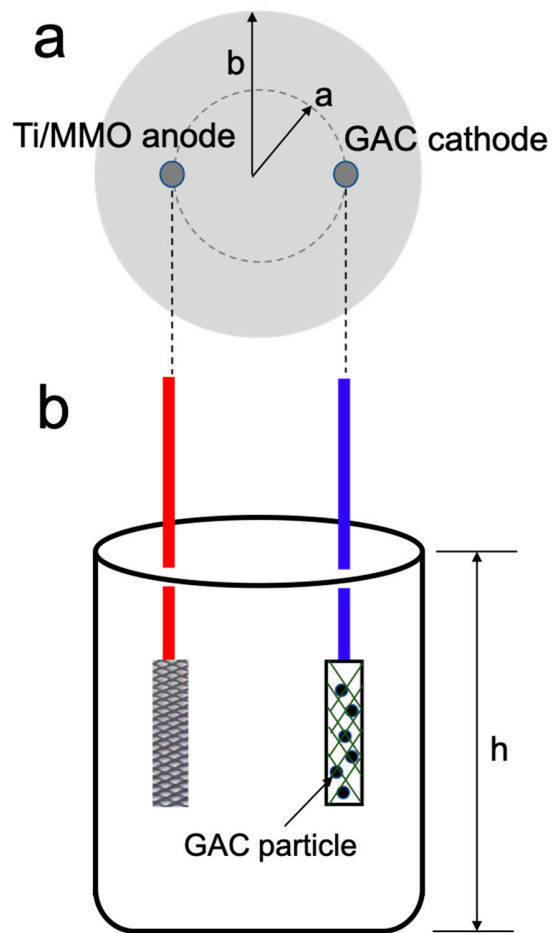

**Figure S1.** Schematic representation of used reactor at (a) top view and (b) side view.  $a$ , 2.5 cm;  $b$ , 3.5 cm;  $h$ , 7 cm.

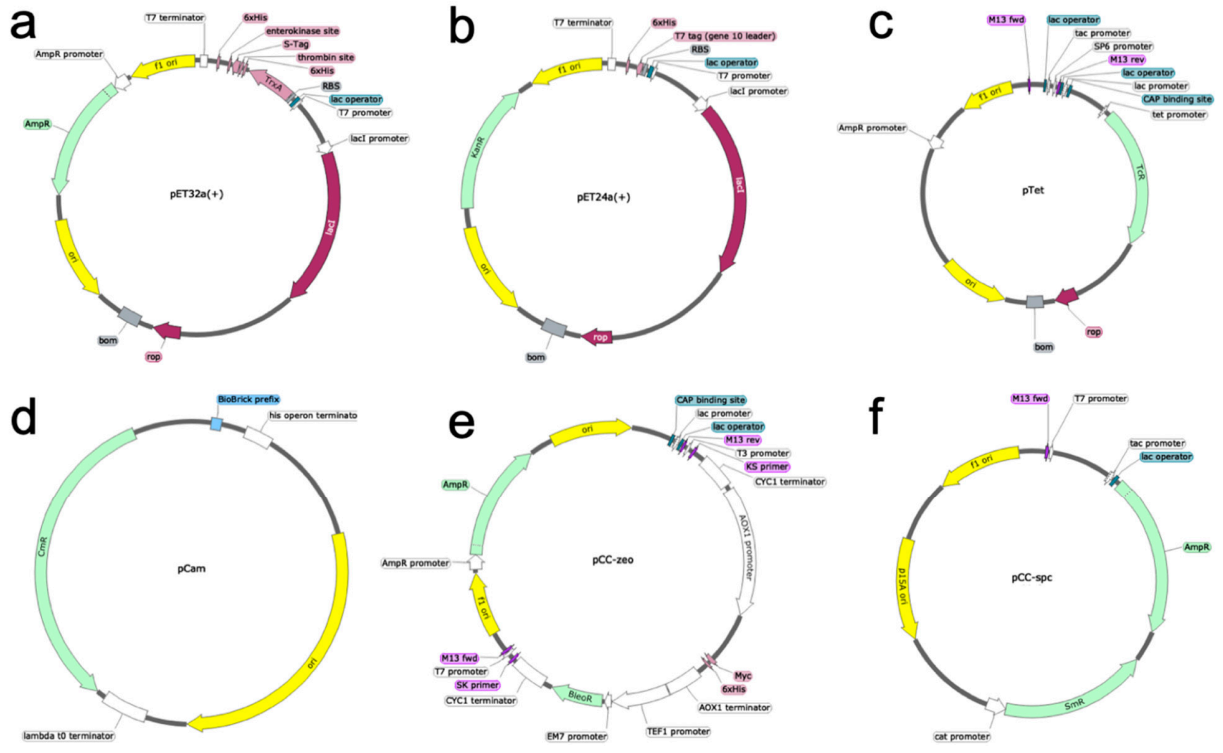

**Figure S2.** Maps of used plasmids in this study to endow corresponding antibiotic resistance.

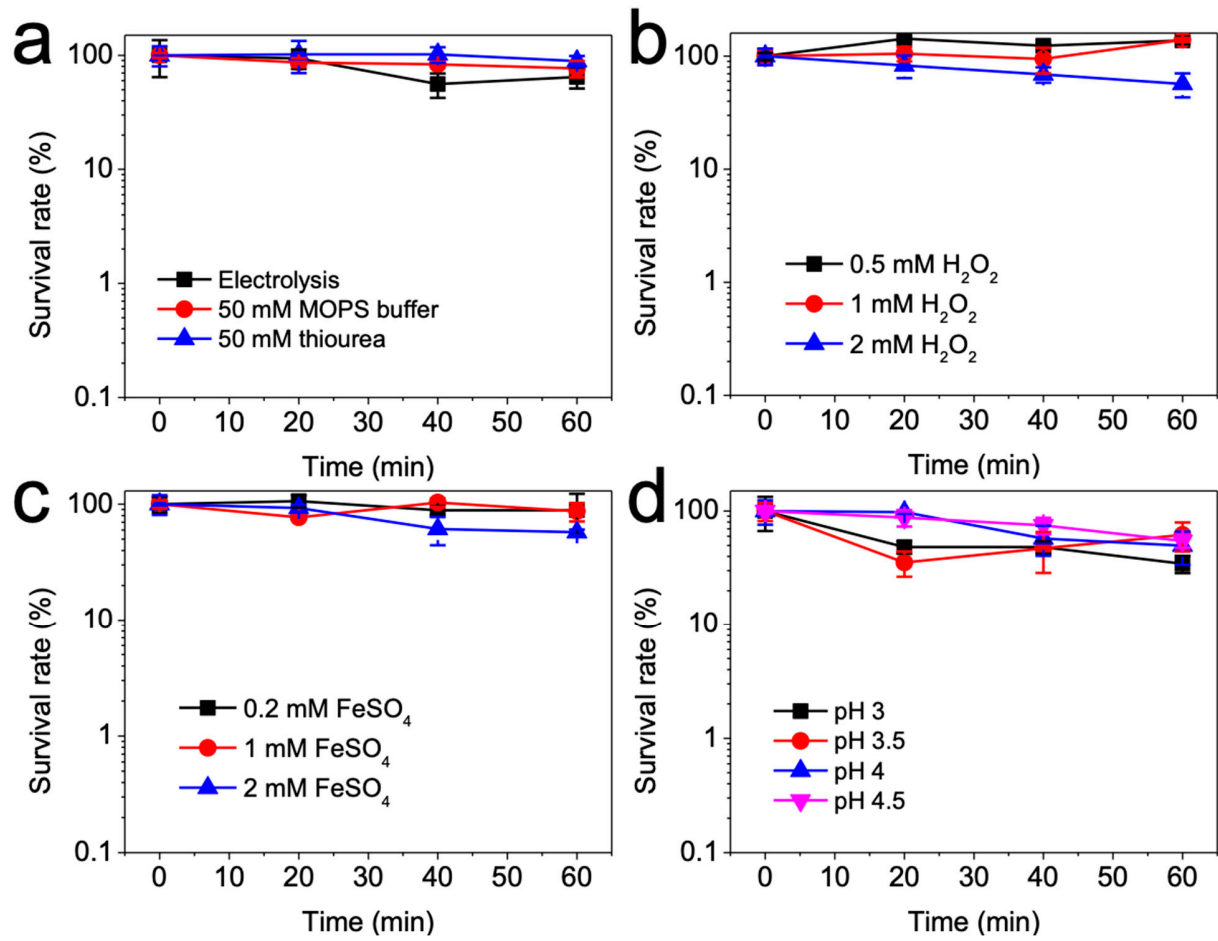

**Figure S3.** *E. coli* inactivation by (a) electrolysis, MOPS buffer or thiourea, (b) hydrogen peroxide, (c) iron ions, and (d) acidic pH.

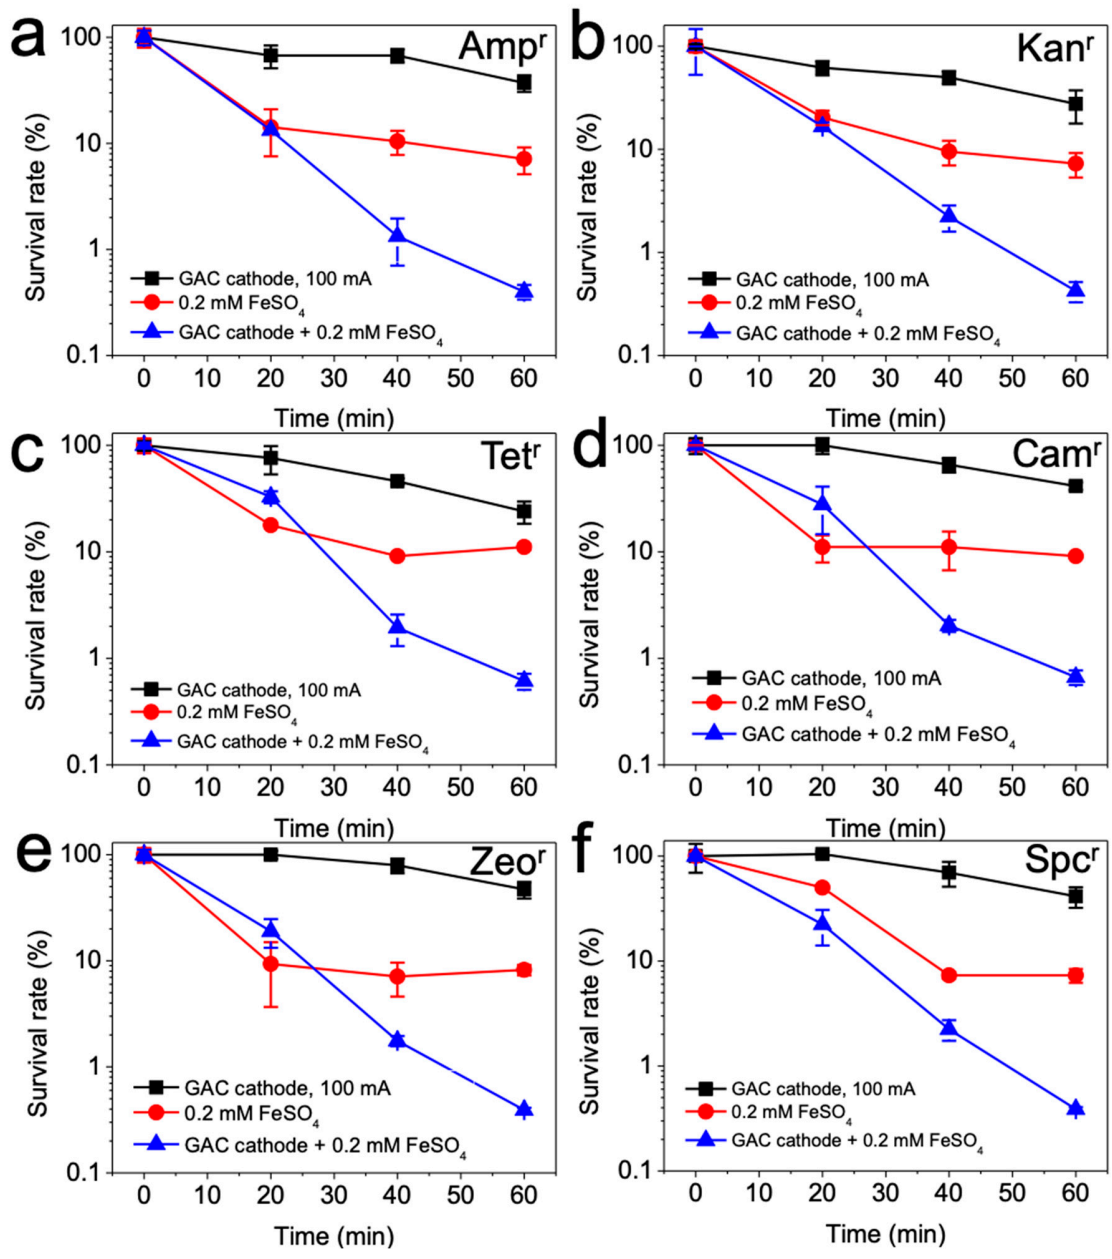

**Figure S4.** Electro-Fenton process disinfection performance towards *E. coli* of different antibiotic-resistances including control experiments during 60 min. Conditions: 3 g GAC as cathode under 100 mA current, 0.2 mM FeSO<sub>4</sub>, 10<sup>8</sup> CFU/mL *E. coli*, pH<sub>ini</sub> 7. Amp<sup>r</sup>, ampicillin-resistant; Kan<sup>r</sup>, kanamycin-resistant; Tet<sup>r</sup>, tetracycline-resistant; Cam<sup>r</sup>, chloramphenicol-resistant; Zeo<sup>r</sup>, zeocyn-resistant; Spc<sup>r</sup>, spectinomycin-resistant.
